## Ventricular stroke work indices to predict mortality after successful percutaneous edge-to-edge-repair for severe mitral valve regurgitation

P. Dierks, R. Osteresch, K. Diehl, A. Ben Ammar, A. Fach, J. Schmucker, O. Solyom, H. Wienbergen, R. Hambrecht

Bremer Institut für Herz- und Kreislaufforschung (BIHKF) am Klinikum Links der Weser, Bremen, Germany

**Funding Acknowledgement:** Type of funding source: Public hospital(s). Main funding source(s): Hospital Links der Weser, Bremen, Germany

**Background:** Several studies identified predictors of worse clinical outcome despite successful transcatheter mitral valve repair (TMVR). The capability of invasively measured left and right ventricular stroke work indices (LVSWi, RVSWi) to predict mortality after successful TMVR is unclear.

**Purpose:** To assess the impact of LVSWi and RVSWi on mortality in patients with chronic heart failure (CHF) and severe mitral regurgitation (MR) undergoing TMVR.

**Methods:** Consecutive patients (pts.) with CHF (LV ejection fraction  $\leq 50\%$  from any cause) and severe MR who underwent successful TMVR ( $MR \leq 2+$  at discharge) were included and followed prospectively. Primary endpoint was defined as all-cause mortality during a median follow-up period of  $16 \pm 9$  months. LVSWi was calculated as: Stroke volume index  $\times$  (mean arterial pressure – postcapillary wedge pressure)  $\times 0.0136 = \text{g/m}^{-1}/\text{m}^2$ . RVSWi was calculated as: Stroke volume index  $\times$  (mean pulmonary artery pressure – right atrial pressure)  $\times 0.0136 = \text{g/m}^{-1}/\text{m}^2$ . Receiver operator characteristic (ROC) analysis was used to determine discriminative capacity of LVSWi and RVSWi. Kaplan-Meier estimate was used for survival analysis. A multivariable Cox proportional-hazards regression analysis was performed to identify independent risk factors for all-cause mortality.

**Results:** 140 patients (median age  $74 \pm 9.9$  years, 67.9% male) at high operative risk (LogEuro-SCORE  $34.6 \pm 14.1\%$ ) were enrolled. Mean LVSWi and RVSWi were  $22.3 \pm 10.7 \text{ g/m}^{-1}/\text{m}^2$  and  $8.9 \pm 4.1 \text{ g/m}^{-1}/\text{m}^2$ , respec-

tively. 46 pts. died (33.1%). Pts. who died presented higher LogEuro-SCORE ( $27.8 \pm 16.6\%$  vs.  $20.1 \pm 13.7\%$ ;  $p=0.001$ ), higher levels of NT-proBNP ( $12121 \pm 10602 \text{ ng/l}$  vs.  $6745 \pm 10820 \text{ ng/l}$ ;  $p=0.001$ ), higher levels of creatinine ( $1.8 \pm 0.8 \text{ mg/dl}$  vs.  $1.4 \pm 0.8 \text{ mg/dl}$ ;  $p<0.001$ ), lower LVSWi ( $18.9 \pm 8.1 \text{ g/m}^{-1}/\text{m}^2$  vs.  $24.0 \pm 11.4 \text{ g/m}^{-1}/\text{m}^2$ ;  $p=0.01$ ) and RVSWi ( $7.8 \pm 3.2 \text{ g/m}^{-1}/\text{m}^2$  vs.  $9.4 \pm 4.4 \text{ g/m}^{-1}/\text{m}^2$ ;  $p=0.037$ ), respectively. ROC curve analysis revealed that optimal sensitivity and specificity were achieved using a threshold of  $24.8 \text{ g/m}^{-1}/\text{m}^2$  for LVSWi (sensitivity 80.4%, specificity 40.2%, area under the curve (AUC) 0.71 [0.60–0.81];  $p=0.001$ ) and  $8.3 \text{ g/m}^{-1}/\text{m}^2$  for RVSWi (sensitivity 67.4%, specificity 57.0%, AUC 0.67 [0.56–0.78];  $p=0.006$ ), respectively. At long-term follow-up, a significantly lower survival rate was observed in pts. with LVSWi  $\leq 24.8 \text{ g/m}^{-1}/\text{m}^2$  (20.0% vs. 39.4%; log-rank  $p=0.038$ ) and in pts. with RVSWi  $\leq 8.3 \text{ g/m}^{-1}/\text{m}^2$  (22.1% vs. 43.7%; log-rank  $p=0.026$ ), respectively. In Cox regression analysis a LVSWi of  $\leq 24.8 \text{ g/m}^{-1}/\text{m}^2$  and a RVSWi of  $\leq 8.3 \text{ g/m}^{-1}/\text{m}^2$  were independent predictors for all-cause mortality (hazard ratio (HR) 2.83; 95% confidence interval (CI) 1.1 to 7.6;  $p=0.04$ ; HR 2.52; 95% CI 1.04 to 6.1;  $p=0.041$ ).

**Conclusions:** LVSWi and RVSWi are associated with mortality among pts. with CHF undergoing successful TMVR for severe MR. A LVSWi cut-off value of  $>24 \text{ g/m}^{-1}/\text{m}^2$  and a RVSWi cut-off value of  $<8 \text{ g/m}^{-1}/\text{m}^2$  seem to predict mortality independent of other clinical and echocardiographic factors.

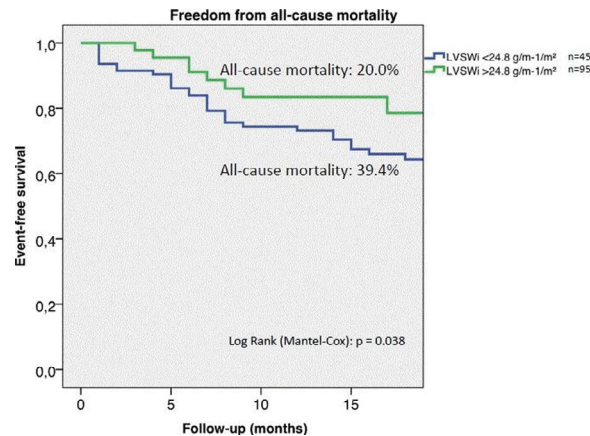

Source: http://academic.oup.com/eurheartj/article-pdf/41/Supplement_2/ehaa946.1958/34513336/ehaa946.1958.pdf
